# Supplementary material for: Evaluation of energy loss at Sn anodes based on phase transition behaviors and formation of electrically resistive phases of Na–Sn batteries
Source: Royal Society of Chemistry journal article supplement (doi:10.1039/c8ta00288f), 2018-01-01
Supplement: c8ta00288f1.pdf [file c8ta00288f1.pdf]

## Supplementary Information

### **Evaluation of energy loss at Sn anodes based on phase transition behaviors and formation of electrically resistive phases of the Na-Sn battery**

Yong-Seok Choi<sup>1</sup>, Young-Woon Byeon<sup>1</sup>, Jae-Pyoung Ahn<sup>2</sup>, and Jae-Chul Lee<sup>1,\*</sup>

<sup>1</sup>Department of Materials Science and Engineering, Korea University, Seoul 136-701, South Korea

<sup>2</sup>Advanced Analysis Center, Korea Institute of Science and Technology, Seoul 136-791, South Korea

\*To whom correspond should be addressed, E-mail: [jclee001@korea.ac.kr](mailto:jclee001@korea.ac.kr)

**Calculation of the voltage values via Gibbs free energy curves for Stage I – IV transitions.**

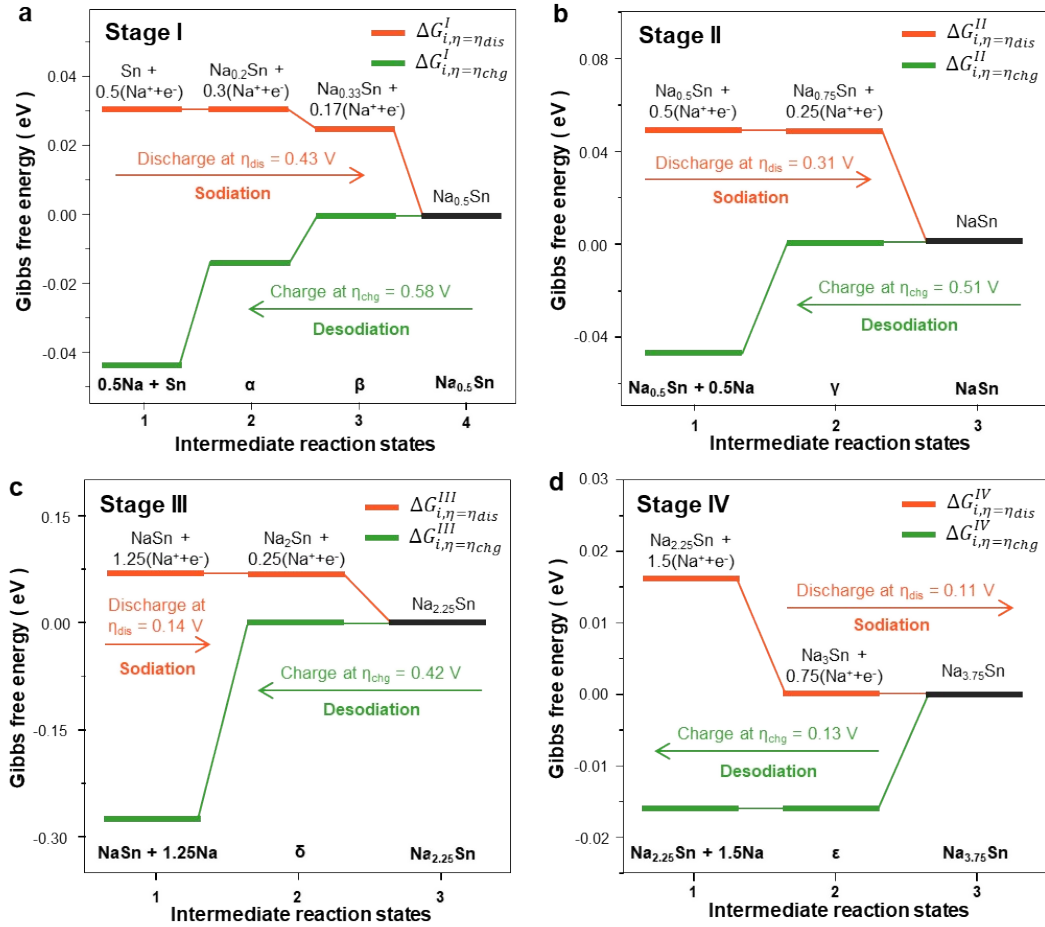

**Figure S1.** Changes in the Gibbs free energy calculated for the intermediate reaction states occurring during (a) Stage I ( $\Delta G_{i,\eta}^I$ ), (b) Stage II ( $\Delta G_{i,\eta}^{II}$ ), (c) Stage III ( $\Delta G_{i,\eta}^{III}$ ), and (d) Stage IV ( $\Delta G_{i,\eta}^{IV}$ ) transitions under the external voltage  $\eta$ . In these graphs, two representative voltage value corresponding to discharge ( $\eta_{\text{dis}}$ ) and charge ( $\eta_{\text{chg}}$ ) are chosen. The greek alphabets indicated in the x-axis denote the intermediate states comprising metastable phases;  $\alpha = 0.3\text{Na} + \text{Na}_{0.2}\text{Sn}$ ,  $\beta = 0.17\text{Na} + \text{Na}_{0.33}\text{Sn}$ ,  $\gamma = \text{Na}_{0.75}\text{Sn} + 0.25\text{Na}$ ,  $\delta = \text{Na}_2\text{Sn} + 0.25\text{Na}$ ,  $\epsilon = \text{Na}_3\text{Sn} + 0.75\text{Na}$ .

By applying the same thermodynamic model as explained in Fig. 2 in the manuscript, the discharge ( $\eta_{\text{dis}}$ ) and charge voltages ( $\eta_{\text{chg}}$ ) corresponding to Stage I – IV can be determined. In this section, we evaluate the  $\eta_{\text{dis}}$  and  $\eta_{\text{chg}}$  values by calculating the changes in the Gibbs free energy in Stage I – IV during charging and discharging. For this purpose, we first evaluated the Gibbs free energy change ( $\Delta G_i^I$ ) associated with the  $i^{\text{th}}$  intermediate reaction in Stage I– IV. This was achieved by add up the Gibbs free energies of all phases (Na, Sn, and  $\text{Na}_x\text{Sn}$  phases) comprising the  $i^{\text{th}}$  intermediate reaction state according to;

$$\text{(Stage I transition)} \quad \Delta G_{i,\eta}^I = 0.5G_{\text{Na}} + G_{\text{Sn}}, i = 1. \quad (\text{S1.1})$$

$$\Delta G_i^I = (0.5 - x)G_{\text{Na}} + xG_{\text{Na}_x\text{Sn}}, i = 2, 3, 4. \quad (\text{S1.2})$$

$$\text{(Stage II transition)} \quad \Delta G_i^{II} = (1.0 - x)G_{\text{Na}} + G_{\text{Na}_x\text{Sn}}, i = 1, 2, 3. \quad (\text{S2})$$

$$\text{(Stage III transition)} \quad \Delta G_i^{III} = (2.25 - x)G_{\text{Na}} + G_{\text{Na}_x\text{Sn}}, i = 1, 2, 3. \quad (\text{S3})$$

$$\text{(Stage IV transition)} \quad \Delta G_i^{IV} = (3.75 - x)G_{\text{Na}} + G_{\text{Na}_x\text{Sn}}, i = 1, 2, 3. \quad (\text{S4})$$

When an external voltage/potential ( $\eta$ ) is applied to the Na-Sn system, the Gibbs free energy of each intermediate reaction in Eqs. (S1–4) decreases linearly in proportion to the  $x$  value of Na in  $\text{Na}_x\text{Sn}$ . Therefore, under the application of the external voltage  $\eta$ , the Gibbs free energy of each intermediate state in Stage I – IV transitions can be evaluated from

$$\text{(Stage I transition)} \quad \Delta G_{i,\eta}^I = 0.5G_{\text{Na}} + G_{\text{Sn}} - (0.5 - x)\eta, i = 1. \quad (\text{S5.1})$$

$$\Delta G_{i,\eta}^I = (0.5 - x)G_{\text{Na}} + xG_{\text{Na}_x\text{Sn}} - (0.5 - x)\eta, i = 2, 3, 4. \quad (\text{S5.2})$$

$$\text{(Stage II transition)} \quad \Delta G_i^{II} = (1.0 - x)G_{Na} + G_{Na_xSn} - (1.0 - x)\eta, \quad i = 1, 2, 3. \quad (\text{S6})$$

$$\text{(Stage III transition)} \quad \Delta G_i^{III} = (2.25 - x)G_{Na} + G_{Na_xSn} - (2.25 - x)\eta, \quad i = 1, 2, 3. \quad (\text{S7})$$

$$\text{(Stage IV transition)} \quad \Delta G_i^{IV} = (3.75 - x)G_{Na} + G_{Na_xSn} - (3.75 - x)\eta, \quad i = 1, 2, 3. \quad (\text{S8})$$

As shown in Eqs (S5–8), the external voltage ( $\eta$ ) changes the Gibbs free energies of the  $i^{\text{th}}$  intermediate reaction states and thus, alters to overall shape of the Gibbs free energy curve during charging and discharging. According to the definitions made in the manuscript, the  $\eta_{\text{dis}}$  value can be determined as the highest voltage that makes the all intermediate states for discharge process to be the free-energy downhill, while the  $\eta_{\text{chg}}$  value as the lowest voltage that causes the all intermediate states for charge process to be the free-energy downhill. By substituting the various  $\eta$  values, we obtained the  $\eta_{\text{dis}}$  and  $\eta_{\text{chg}}$  values for Stage I – IV transitions that satisfied the above-mentioned criteria (Fig. S1). Therefore, the  $\eta_{\text{dis}}$  and  $\eta_{\text{chg}}$  corresponding to Stage I – IV transitions are determined to be  $\eta_{\text{dis}} = 0.43$  (Stage I), 0.31 (Stage II), 0.14 (Stage III), 0.11 V (Stage IV) and  $\eta_{\text{chg}} = 0.58$  (Stage I), 0.51 (Stage II), 0.42 (Stage III), 0.13 V (Stage IV), which is also summarized in Table 2 in the manuscript.
